# Supplementary material for: CDR2 is a dynein adaptor recruited by kinectin to regulate ER sheet organization
Source: PubMed Central journal article supplement (PMC11580933; doi:10.1101/2024.11.06.622207), 2024-11-06

1176 **Figure S1: Related to Figure 1.**

1177 **(A)** AF2 model and PAE plot of the CDR2 N-terminal coiled-coil in complex with the DLIC1 C-  
1178 terminal helix and an N-terminal DHC fragment, which in turn is bound to the WD40 domain of  
1179 DIC2.

1180 **(B)** Sequence alignment of the CC1 box and the dynein heavy chain binding site 1 (HBS1) in  
1181 CDR2 and CDR2L proteins from different species (note invertebrates possess a single  
1182 CDR2/CDR2L homolog). The HBS1 sequence is divergent from that of other adaptors but the  
1183 interaction is predicted at the correct distance from the CC1 box. 6 residues, marked with  
1184 asterisks, were mutated to alanine (HBS1\_6A mutant) based on sequence conservation among  
1185 CDR2 proteins and their position in the predicted structure. Accession numbers: CDR2\_HUMAN  
1186 (UniProt Q01850), CDR2L\_HUMAN (UniProt Q86X02), CDR2\_MOUSE (UniProt P97817),  
1187 CDR2L\_MOUSE (UniProt A2A6T1), CDR2\_XENTR (UniProt F6R4S1), CDR2L\_XENTR (UniProt  
1188 A0A803JSM3), CDR2\_DANRE (UniProt E7FC97), CDR2L\_DANRE (UniProt Q6NZZ2),

1189 CDR2\_BRABE (UniProt A0A6P4ZS94), CDR2\_SACKO (NCBI Reference Sequence  
1190 XP\_002736317.2), CDR2\_STRPU (UniProt A0A7M7NRE1), CDR2\_LINAN (NCBI Reference  
1191 Sequence XP\_013392376.1), CEN\_DROME (UniProt Q9VIK6), CDR2\_HYDVU (UniProt  
1192 A0A8B6XII3). Species key (Phylum): HUMAN, *Homo sapiens* (Chordata); MOUSE, *Mus*  
1193 *musculus* (Chordata); XENTR, *Xenopus tropicalis* (Chordata); DANRE, *Danio rerio* (Chordata);  
1194 BRABE, *Branchiostoma belcheri* (Chordata); SACKO, *Saccoglossus kowalevskii* (Hemichordata);  
1195 STRPU, *Strongylocentrotus purpuratus* (Echinodermata); LINAN, *Lingula anatina* (Brachiopoda);  
1196 DROME, *Drosophila melanogaster* (Arthropoda); HYDVU, *Hydra vulgaris* (Cnidaria).

1197 **(C)** Elution profiles and BlueSafe-stained SDS-PAGE gels of purified recombinant human CDR2  
1198 and DLIC1 fragments after SEC. DLIC1-C corresponds to residues 388-523. The elution profile  
1199 and gel for CDR2 are shown on both left and right to facilitate comparison between wild-type  
1200 DLIC1-C and the F447A/F448A mutant. Molecular weight is indicated in kilodaltons (kDa).

1201

1202 **Figure S2: Related to Figure 2.**

1203 **(A)** Immunoblots of HeLa cells harboring single and double KOs of CDR2 and CDR2L (two  
1204 independently derived cell lines were analyzed for each condition). GAPDH serves as the loading  
1205 control. Molecular weight is indicated in kilodaltons (kDa).

1206 **(B)** Immunoblots of CDR2/L double KO cells stably expressing GFP::3xFLAG::CDR2 or CDR2L,  
1207 used for the experiments in *Fig. 2A*. GAPDH serves as the loading control. Molecular weight is  
1208 indicated in kilodaltons (kDa).

1209 **(C)** Immunofluorescence of CDR2/L double KO cells stably expressing GFP::3xFLAG::CDR2L,  
1210 showing co-localization with KTN1 and diffuse cytoplasmic signal. Note that while average  
1211 expression levels of transgene-encoded CDR2L are significantly higher than those of endogenous  
1212 CDR2L, as shown in *(B)*, expression in individual cells is variable. Cells shown here have relatively  
1213 low expression levels. Scale bar, 10  $\mu$ m.

1214 **(D)** Sequence alignment of the C-terminal helix in CDR2 and CDR2L proteins from different  
1215 species. Accession numbers and species key as in *Fig. S1B*.

1216 **(E)–(G)** Immunofluorescence images and immunoblots showing knockdown of KTN1 by RNAi  
1217 and the resulting delocalization/destabilization of CDR2 in HeLa cells. By contrast, KTN1 levels  
1218 remain unaffected in CDR2/L double KO cells (two independently derived KO cell lines were  
1219 analyzed). Scale bars, 20  $\mu$ m (*E*) and 10  $\mu$ m (*F*). Molecular weight is indicated in kilodaltons (kDa).

1220 **(H)** Sequence alignment of the CDR2/eEF1B $\beta$  binding site in KTN1 and its paralog RRBP1 (p180)  
1221 from different species (invertebrates possess a single KTN1/RRBP1 homolog). Accession  
1222 numbers: KTN1\_HUMAN (UniProt Q86UP2), RRBP1\_HUMAN (Q9P2E9), KTN1\_MOUSE

1223 (UniProt Q61595), RRBP1\_MOUSE (UniProt Q99PL5), KTN1\_XENTR (UniProt B3DL66),  
1224 RRBP1\_XENTR (UniProt F7A6K6), KTN1\_DANRE (UniProt E7F049), RRBP1\_DANRE (UniProt  
1225 B8A4D7), RRBP1\_BRABE (UniProt A0A6P5A3T7), RRBP1\_SACKO (NCBI Reference  
1226 Sequence XP\_002741373.1), RRBP1\_STRPU (A0A7M7LVI4), KTN1\_LINAN (NCBI Reference  
1227 Sequence XP\_013397491.1). Species key as in *Fig. S1B*. No CDR2 binding site could be  
1228 identified for the KTN1/RRBP1 homologs of DROME and HYDVU (UniProt Q960Y8 and T2M451,  
1229 respectively), despite the presence of a well conserved CDR2 helix, as shown in (*D*).

1230

1231 **Figure S3: Related to Figures 3, 4 and 5.**

1232 **(A)** (*left*) Immunofluorescence images showing exacerbated patchy distribution of KTN1 in HeLa  
1233 CDR2/L double KO cells. Scale bar, 20  $\mu\text{m}$ . (*right*) Fraction of cells with prominent KTN1 patches,  
1234 plotted as mean  $\pm$  SD (4 independent experiments, >1000 cells scored in total per condition).  
1235 Statistical significance was determined using a two-tailed t test. \*\*\*\* $P < 0.0001$ . These cells were  
1236 treated with siRNA against Luciferase, which further enhances KTN1 patch formation in CDR2/L  
1237 double KO cells relative to untreated cells (compare with quantification in *Fig. 3A*).

1238 **(B)** Correlative light–electron microscopy images of CDR2/L double KO cells showing that the  
1239 KTN1 patches observed by immunofluorescence correspond to stacked ER sheets. Scale bars,  
1240 5  $\mu\text{m}$  (*top*) and 1  $\mu\text{m}$  (*bottom*).

1241 **(C)** Fraction of cells (mean  $\pm$  SD, 4 and 3 independent experiments for  $\Delta\text{CC1}$  box and  $\Delta\text{Helix}$ ,  
1242 respectively; >580 cell scored in total per condition) with prominent KTN1 patches (*left*) or  
1243 centrosome-proximal KTN1 clustering (*right*) in the conditions shown in *Fig. 3E*, using a second  
1244 independently derived CDR2/L double KO cell line.  $\Delta\text{CC1}$  box and  $\Delta\text{Helix}$  experiments each have  
1245 their own WT and GFP-negative controls. Statistical significance was determined using ordinary  
1246 one-way ANOVA followed by Tukey's multiple comparisons test. \*\*\*\* $P < 0.0001$ ; \*\* $P < 0.01$ ; *ns* =  
1247 not significant,  $P > 0.05$ .

1248 **(D)** (*left*) TEM images of ER sheets in CDR2/L double KO cells with and without knockdown of  
1249 KTN1. Scale bar, 1  $\mu\text{m}$ . (*right*) Number of ER sheets in the largest stack per cell, determined as  
1250 described in *Fig. 3B*. The CDR2/L double KO data is the same as in *Fig. 3B*.

1251 **(E)** Immunofluorescence image showing penetrant and tight clustering of KTN1 in the presence  
1252 of JIP3(1–185)::CDR2(186–454). Scale bar, 10  $\mu\text{m}$ .

1253 **(F)** AF2 model and predicted alignment error (PAE) plot of full-length eEF1B $\beta$  in complex with the  
1254 KTN1 C-terminus. One copy of eEF1B $\beta$  was used for the prediction, but note that eEF1B $\beta$  can  
1255 form a trimer through its leucine zipper (LZ) domain (Bondarchuk *et al.*, 2022).

1256 **(G)** Immunofluorescence images (maximum intensity projection of z-stack) showing that eEF1B $\beta$   
1257 knockdown in CDR2/L double KO cells does not alter KTN1 distribution (see corresponding  
1258 quantification in *Fig. 5C*). Scale bar, 10  $\mu$ m.

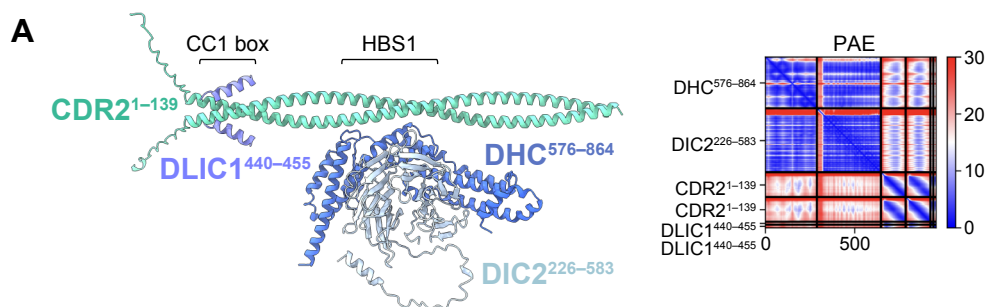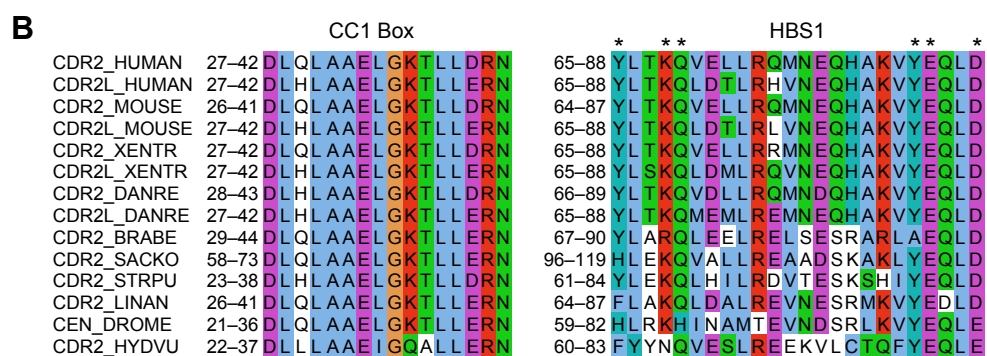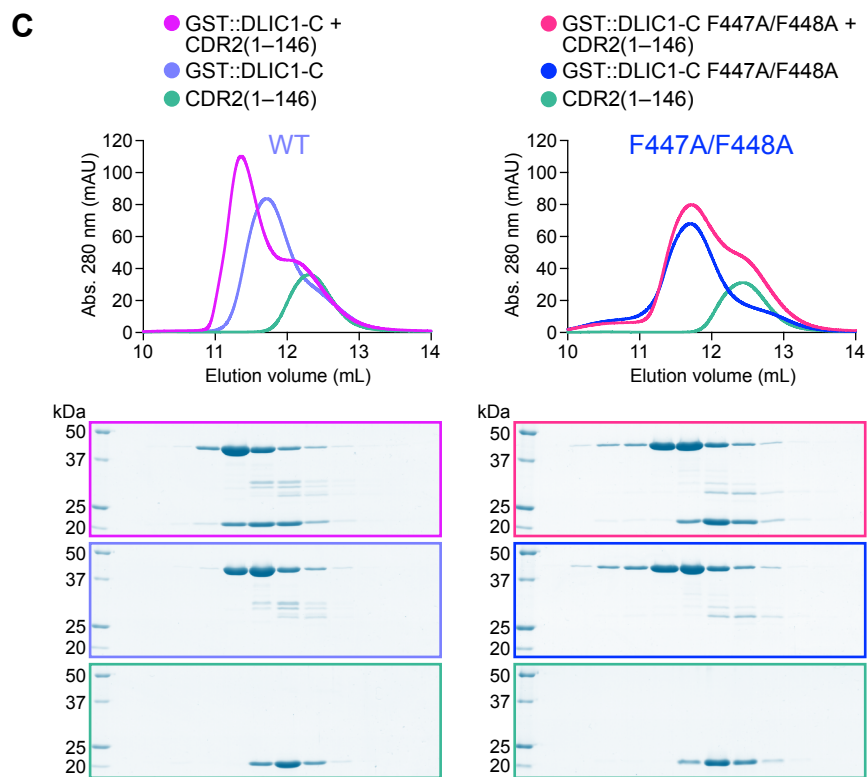

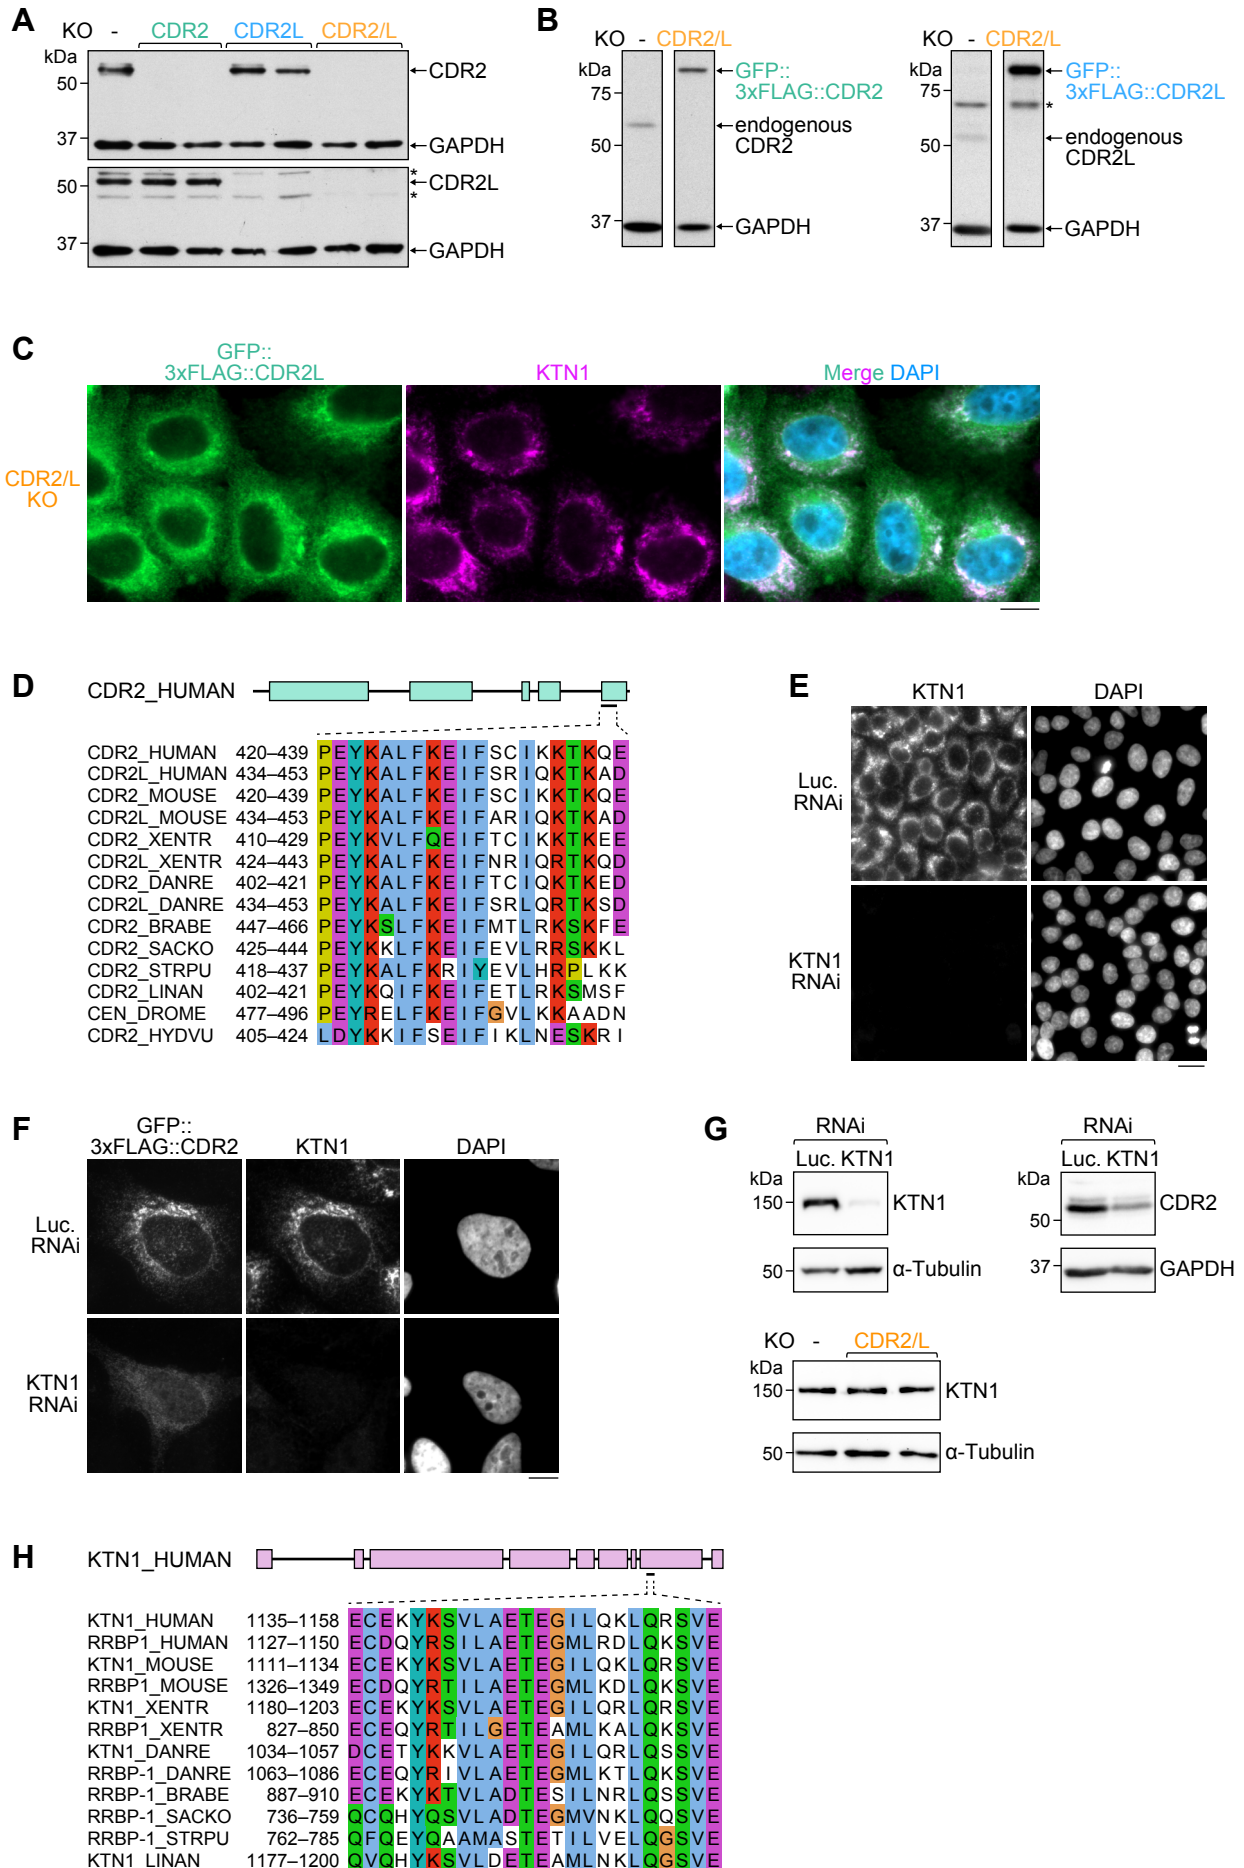



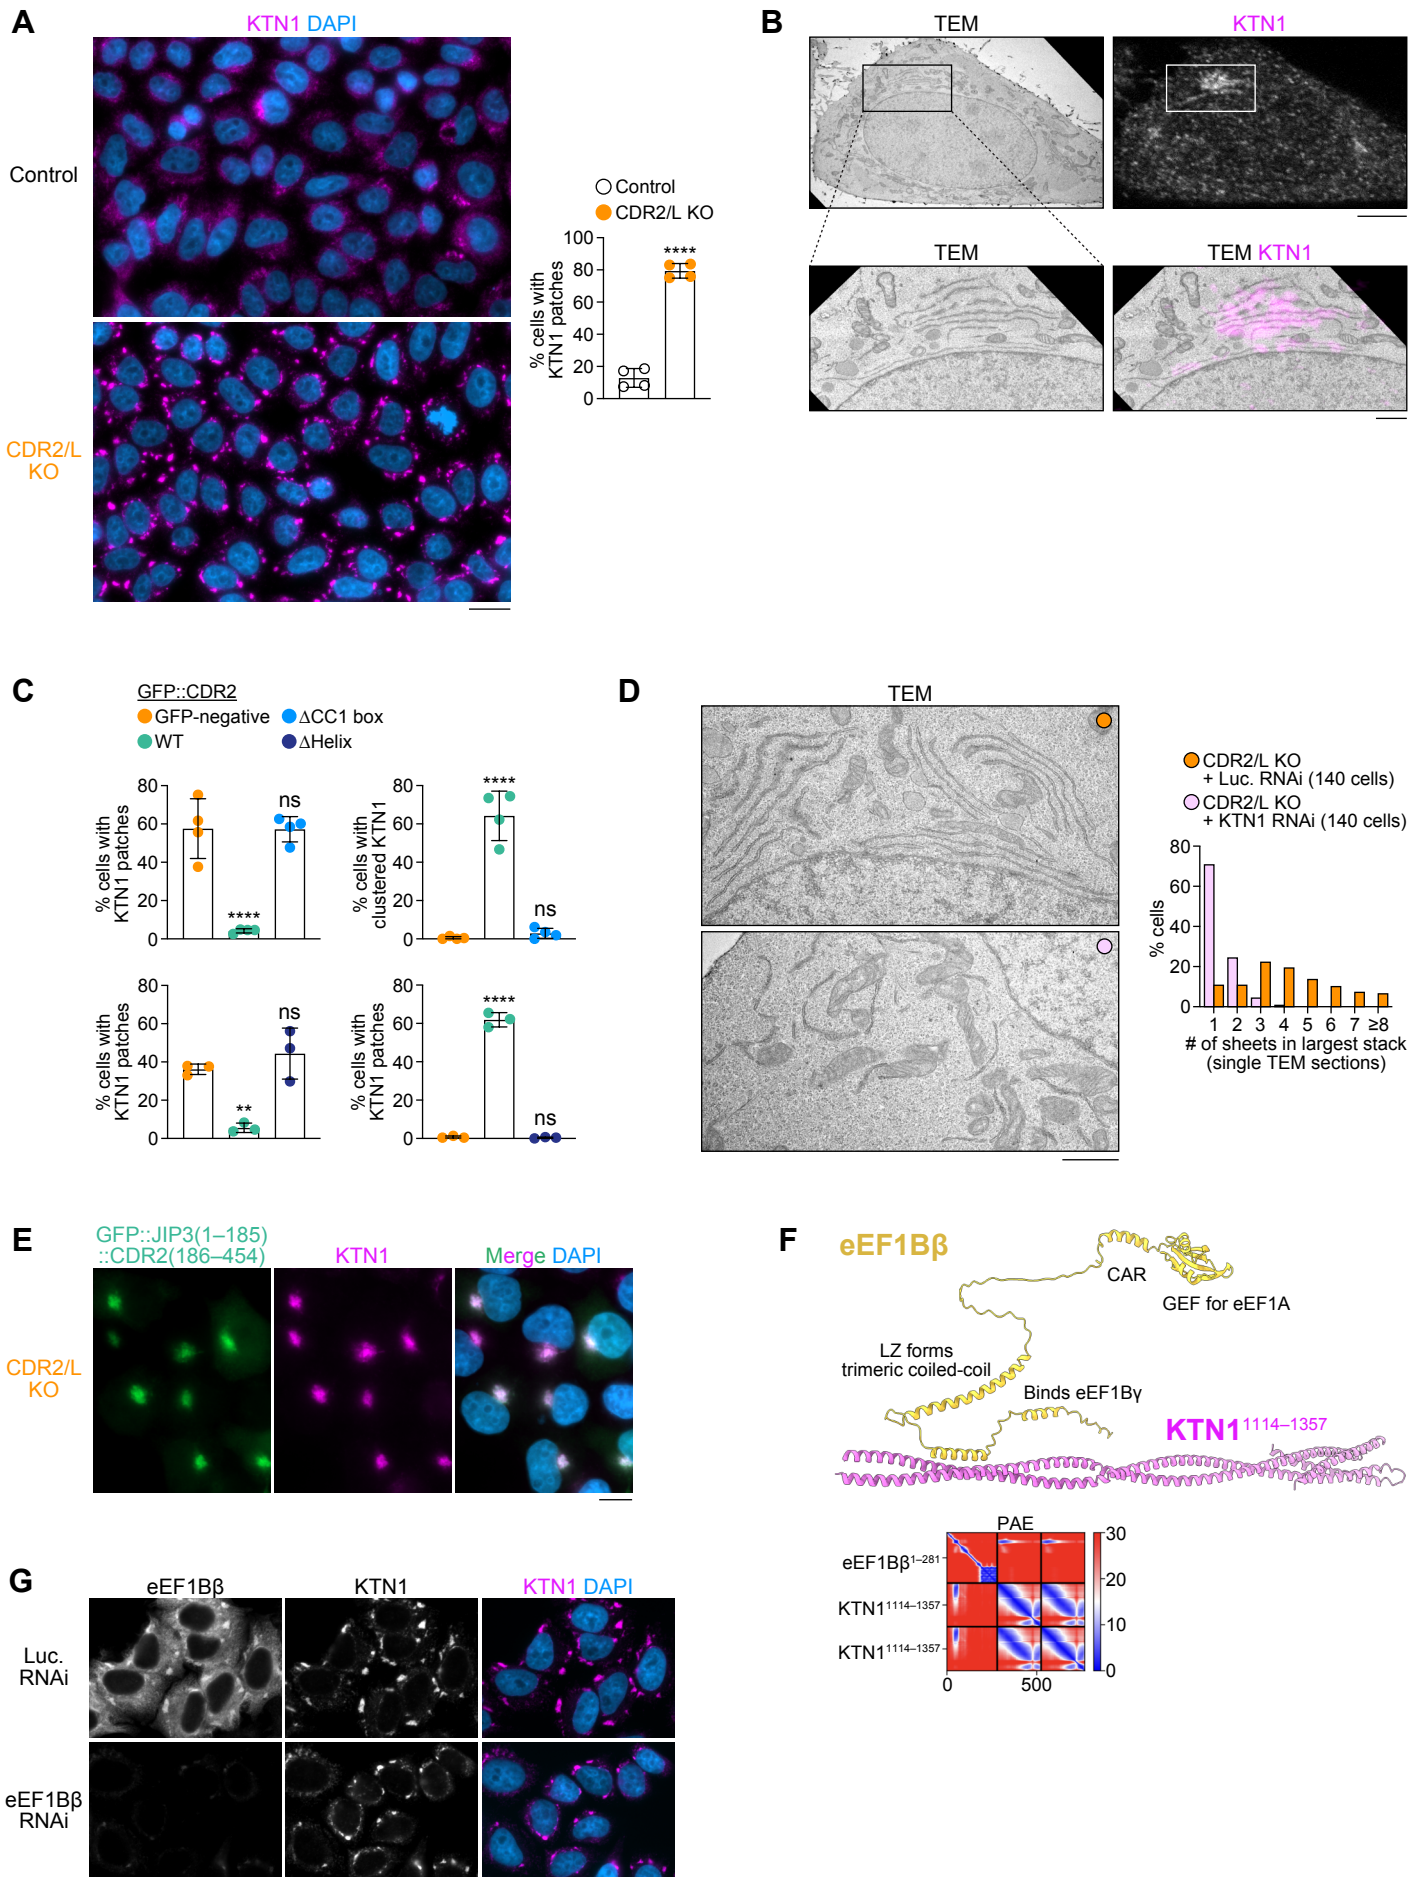

Supplement: NIHPP2024.11.06.622207v1-supplement-1.pdf [file NIHPP2024.11.06.622207v1-supplement-1.pdf]
